# Supplementary material for: Acoel single-cell atlas reveals expression dynamics and heterogeneity of adult pluripotent stem cells
Source: PubMed Central journal article supplement (PMC10163032; doi:10.1038/s41467-023-38016-4), 2023-05-05
Supplement: 41467_2023_38016_MOESM2_ESM.pdf [file 41467_2023_38016_MOESM2_ESM.pdf]

## Description of Additional Supplementary Files

**Title: Supplementary Data 1.**

**Description:** Summary statistics for single-cell data sets.

**Title: Supplementary Data 2.**

**Description:** Markers from each cluster for the postembryonic development stages as determined by Seurat.

**Title: Supplementary Data 3.**

**Description:** Stage-specific clusters in the postembryonic development scRNA-seq data as determined by Seurat.

**Title: Supplementary Data 4.**

**Description:** Cluster markers for the merged postembryonic development scRNA-seq data set as determined by Seurat and associated cluster key.

**Title: Supplementary Data 5.**

**Description:** Shared cell type expression comparison between hatchling juvenile and late juvenile populations as determined by Seurat and associated GO.

**Title: Supplementary Data 6.**

**Description:** Shared cell type expression comparison between hatchling juvenile and early adult populations as determined by Seurat and associated GO.

**Title: Supplementary Data 7.**

**Description:** Shared cell type expression comparison between hatchling juvenile and late adult populations as determined by Seurat and associated GO.

**Title: Supplementary Data 8.**

**Description:** Orthology assessment for transcription factors associated with specialized neoblast and progenitor populations.

**Title: Supplementary Data 9.**

**Description:** Cluster markers for the merged regeneration scRNA-seq data set as determined by Seurat and associated cluster key.

**Title: Supplementary Data 10.**

**Description:** Digestive cell type expression comparisons across regeneration time points as determined by Seurat and associated GO.

**Title: Supplementary Data 11.**

**Description:** Epidermal cell type expression comparisons across regeneration time points as determined by Seurat and associated GO.

**Title: Supplementary Data 12.**

**Description:** Muscle cell type expression comparisons across regeneration time points as determined by Seurat and associated GO.

**Title: Supplementary Data 13.**

**Description:** Neural cell type expression comparisons across regeneration time points as determined by Seurat and associated GO.

**Title: Supplementary Data 14.**

**Description:** Endoderm-like I cell type expression comparisons across regeneration time points as determined by Seurat and associated GO.

**Title: Supplementary Data 15.**

**Description:** Endoderm-like II/III cell type expression comparisons across regeneration time points as determined by Seurat and associated GO.

**Title: Supplementary Data 16.**

**Description:** Endodermal progenitor cell type expression comparisons across regeneration time points as determined by Seurat and associated GO.

**Title: Supplementary Data 17.**

**Description:** Epidermal progenitor cell type expression comparisons across regeneration time points as determined by Seurat and associated GO.

**Title: Supplementary Data 18.**

**Description:** Secretory cell type expression comparisons across regeneration time points as determined by Seurat and associated GO.

**Title: Supplementary Data 19.**

**Description:** Germline cell type expression comparisons across regeneration time points as determined by Seurat and associated GO.

**Title: Supplementary Data 20.**

**Description:** Neoblast cell type expression comparisons across regeneration time points as determined by Seurat and associated GO.

**Title: Supplementary Data 21.**

**Description:** Markers from the merged regeneration neoblasts subclusters as determined by Seurat.

**Title: Supplementary Data 22.**

**Description:** Neoblast subset differential gene expression 6v0hpa as determined by Seurat.

**Title: Supplementary Data 23.**

**Description:** Primer sequences for screened marker genes from the single-cell experiments.
