# Supplementary material for: Acoel single-cell atlas reveals expression dynamics and heterogeneity of adult pluripotent stem cells
Source: PubMed Central journal article supplement (PMC10163032; doi:10.1038/s41467-023-38016-4), 2023-05-05
Supplement: 41467_2023_38016_MOESM26_ESM.pdf [file 41467_2023_38016_MOESM26_ESM.pdf]

## Reporting Summary

Nature Portfolio wishes to improve the reproducibility of the work that we publish. This form provides structure for consistency and transparency in reporting. For further information on Nature Portfolio policies, see our [Editorial Policies](#) and the [Editorial Policy Checklist](#).

### Statistics

For all statistical analyses, confirm that the following items are present in the figure legend, table legend, main text, or Methods section.

- |                                     |                                                                                                                                                                                                                                                                                                |
|-------------------------------------|------------------------------------------------------------------------------------------------------------------------------------------------------------------------------------------------------------------------------------------------------------------------------------------------|
| n/a                                 | Confirmed                                                                                                                                                                                                                                                                                      |
| <input type="checkbox"/>            | <input checked="" type="checkbox"/> The exact sample size ( $n$ ) for each experimental group/condition, given as a discrete number and unit of measurement                                                                                                                                    |
| <input type="checkbox"/>            | <input checked="" type="checkbox"/> A statement on whether measurements were taken from distinct samples or whether the same sample was measured repeatedly                                                                                                                                    |
| <input type="checkbox"/>            | <input checked="" type="checkbox"/> The statistical test(s) used AND whether they are one- or two-sided<br><i>Only common tests should be described solely by name; describe more complex techniques in the Methods section.</i>                                                               |
| <input checked="" type="checkbox"/> | <input type="checkbox"/> A description of all covariates tested                                                                                                                                                                                                                                |
| <input checked="" type="checkbox"/> | <input type="checkbox"/> A description of any assumptions or corrections, such as tests of normality and adjustment for multiple comparisons                                                                                                                                                   |
| <input type="checkbox"/>            | <input checked="" type="checkbox"/> A full description of the statistical parameters including central tendency (e.g. means) or other basic estimates (e.g. regression coefficient) AND variation (e.g. standard deviation) or associated estimates of uncertainty (e.g. confidence intervals) |
| <input type="checkbox"/>            | <input checked="" type="checkbox"/> For null hypothesis testing, the test statistic (e.g. $F$ , $t$ , $r$ ) with confidence intervals, effect sizes, degrees of freedom and $P$ value noted<br><i>Give <math>P</math> values as exact values whenever suitable.</i>                            |
| <input checked="" type="checkbox"/> | <input type="checkbox"/> For Bayesian analysis, information on the choice of priors and Markov chain Monte Carlo settings                                                                                                                                                                      |
| <input checked="" type="checkbox"/> | <input type="checkbox"/> For hierarchical and complex designs, identification of the appropriate level for tests and full reporting of outcomes                                                                                                                                                |
| <input type="checkbox"/>            | <input checked="" type="checkbox"/> Estimates of effect sizes (e.g. Cohen's $d$ , Pearson's $r$ ), indicating how they were calculated                                                                                                                                                         |

*Our web collection on [statistics for biologists](#) contains articles on many of the points above.*

### Software and code

Policy information about [availability of computer code](#)

Data collection

Data analysis

For manuscripts utilizing custom algorithms or software that are central to the research but not yet described in published literature, software must be made available to editors and reviewers. We strongly encourage code deposition in a community repository (e.g. GitHub). See the Nature Portfolio [guidelines for submitting code & software](#) for further information.

### Data

Policy information about [availability of data](#)

All manuscripts must include a [data availability statement](#). This statement should provide the following information, where applicable:

- Accession codes, unique identifiers, or web links for publicly available datasets
- A description of any restrictions on data availability
- For clinical datasets or third party data, please ensure that the statement adheres to our [policy](#)

Data generated in this study are included in this published article and supplementary files. Sequencing raw reads and processed counts matrices associated with this study will be deposited as NCBI BioProjects PRJNA888438 (postembryonic development) and PRJNA908236 (regeneration time course). Processed count matrices and R scripts are also available on Github with the zenodo DOI: 10.5281/zenodo.7700424. An online resource was generated to access and visualize the scRNA-seq, found at <https://dredge.ptgolden.org/sc/?page=home>.

## Human research participants

Policy information about [studies involving human research participants and Sex and Gender in Research](#).

|                             |                                                            |
|-----------------------------|------------------------------------------------------------|
| Reporting on sex and gender | <input type="text" value="Not applicable to this study."/> |
| Population characteristics  | <input type="text" value="Not applicable to this study."/> |
| Recruitment                 | <input type="text" value="Not applicable to this study."/> |
| Ethics oversight            | <input type="text" value="Not applicable to this study."/> |

Note that full information on the approval of the study protocol must also be provided in the manuscript.

## Field-specific reporting

Please select the one below that is the best fit for your research. If you are not sure, read the appropriate sections before making your selection.

Life sciences       Behavioural & social sciences       Ecological, evolutionary & environmental sciences

For a reference copy of the document with all sections, see [nature.com/documents/nr-reporting-summary-flat.pdf](https://nature.com/documents/nr-reporting-summary-flat.pdf)

## Life sciences study design

All studies must disclose on these points even when the disclosure is negative.

|                 |                                                                                                                                                                                                                                                                                                                                   |
|-----------------|-----------------------------------------------------------------------------------------------------------------------------------------------------------------------------------------------------------------------------------------------------------------------------------------------------------------------------------|
| Sample size     | <input type="text" value="Determined by the limits of the inDrops assay which states 3000 cells/library. Each experiment was done in triplicate i.e. three libraries were made per sample. For FISH experiments, experiments were done in at least triplicate with at least 5 animals per condition and repeated successfully."/> |
| Data exclusions | <input type="text" value="No data were excluded from this study."/>                                                                                                                                                                                                                                                               |
| Replication     | <input type="text" value="At least 3 libraries per sample were successfully prepared for the single-cell data. For FISH experiments, experiments were done in at least triplicate with at least 5 animals per condition and repeated successfully."/>                                                                             |
| Randomization   | <input type="text" value="Cell clustering was performed using unbiased statistical methods and then fine-tuned based on FISH corroboration."/>                                                                                                                                                                                    |
| Blinding        | <input type="text" value="Blinding is not relevant because single-cell data analysis was performed using an unbiased pipeline and then corroborated by FISH."/>                                                                                                                                                                   |

## Reporting for specific materials, systems and methods

We require information from authors about some types of materials, experimental systems and methods used in many studies. Here, indicate whether each material, system or method listed is relevant to your study. If you are not sure if a list item applies to your research, read the appropriate section before selecting a response.

### Materials & experimental systems

| n/a                                 | Involvement                         | Included in study             |
|-------------------------------------|-------------------------------------|-------------------------------|
| <input checked="" type="checkbox"/> | <input type="checkbox"/>            | Antibodies                    |
| <input checked="" type="checkbox"/> | <input type="checkbox"/>            | Eukaryotic cell lines         |
| <input checked="" type="checkbox"/> | <input type="checkbox"/>            | Palaeontology and archaeology |
| <input type="checkbox"/>            | <input checked="" type="checkbox"/> | Animals and other organisms   |
| <input checked="" type="checkbox"/> | <input type="checkbox"/>            | Clinical data                 |
| <input checked="" type="checkbox"/> | <input type="checkbox"/>            | Dual use research of concern  |

### Methods

| n/a                                 | Involvement              | Included in study      |
|-------------------------------------|--------------------------|------------------------|
| <input checked="" type="checkbox"/> | <input type="checkbox"/> | ChIP-seq               |
| <input checked="" type="checkbox"/> | <input type="checkbox"/> | Flow cytometry         |
| <input checked="" type="checkbox"/> | <input type="checkbox"/> | MRI-based neuroimaging |

## Animals and other research organisms

Policy information about [studies involving animals](#); [ARRIVE guidelines](#) recommended for reporting animal research, and [Sex and Gender in Research](#)

|                    |                                                                                                                                                                     |
|--------------------|---------------------------------------------------------------------------------------------------------------------------------------------------------------------|
| Laboratory animals | <input type="text" value="Hofstemia miamia; Ages include hatchling juveniles (14 days post lay) through late adult (&gt;90 days post lay). Single cell data were"/> |
|--------------------|---------------------------------------------------------------------------------------------------------------------------------------------------------------------|

|                         |                                                                                                                                                                              |
|-------------------------|------------------------------------------------------------------------------------------------------------------------------------------------------------------------------|
| Laboratory animals      | collected from animals from 4 different ages (as outlined in the methods). Most FISH were performed in 2-3 week old animals. Germ line FISH were performed in adult animals. |
| Wild animals            | This study did not include wild caught animals.                                                                                                                              |
| Reporting on sex        | The animals are hermaphrodites and sampled at random.                                                                                                                        |
| Field-collected samples | No samples were collected in the field for this study.                                                                                                                       |
| Ethics oversight        | No ethical approval required because these are unregulated marine invertebrate animals.                                                                                      |

Note that full information on the approval of the study protocol must also be provided in the manuscript.
